# Supplementary material for: Pathogenesis and transmission of SARS-CoV-2 in golden hamsters
Source: Springer Nature journal article supplement (doi:10.1038/s41586-020-2342-5), 2020-05-14
Supplement: 41586_2020_2342_MOESM2_ESM.pdf [file 41586_2020_2342_MOESM2_ESM.pdf]

## Peer Review File

**Manuscript Title: Pathogenesis and transmission of SARS-CoV-2 in golden Syrian hamsters**

**Reviewer Reports on the Initial Version:**

Referee #1 (Remarks to the Author):

I have reviewed the manuscript by Sin Fun Sia et al. concerning a hamster model for SARS-CoV-2. The authors describe high levels of virus replication and shedding in the hamster, observe weight loss, and describe histological changes in upper and lower respiratory tract and in the intestinal tract. The study also describes contact transmission to naïve hamsters, with weight loss, virus replication and seroconversion in the contact hamsters. The study is well-executed and data are well-described. A small animal model for SARS-CoV-2 that does not require genetic manipulation of the host (e.g. knockout/in mice) or the virus (e.g. mouse-adapted virus) is an incredibly important tool for studying pathogenesis and medical countermeasures for COVID-19. I only have minor comments.

It is unfortunate that the authors did not collect rectal swabs, it would have been nice to see if the viral antigen observed by IHC correlates with viral shedding from the intestinal tract. But if these samples weren't collected there is nothing to be done about that.

It is of interest to describe the lung lesions more specifically: were entire lungs affected or were these lesions focal?

In Fig. 1A-C it would be helpful to use a different color for symbols indicating viral RNA vs symbols indicating virus titer.

For the histology panels, it would be helpful to indicate some of the elements described in the text with arrows.

I hope the authors are testing whether this virus can transmit via air. The question keeps coming up and hasn't been adequately addressed so far.

Referee #2 (Remarks to the Author):

In this manuscript, Sia et al show that Golden Syrian hamsters infected with SARS-CoV-2 may be a useful model for studying mild human COVID-19. The authors demonstrate infection of hamsters and most importantly, transmission to co-housed hamsters. The data are convincing and the manuscript is well written.

The main problem with the manuscript is that it is not novel. A previous report authored by another group in Hong Kong was published in *Clinical Infectious Diseases* and obtained virtually identical results. The only obvious difference between the studies is that contact hamsters did not lose weight in the published study while the contact hamsters in the study under consideration did. The

published study also included additional experiments.

Other comments:

1. The transmission studies are important and should be extended to co-housed hamsters separated by a wire screen. Hamster grooming habits may limit the relevance to human transmission.
2. Figure 1-The different shades of blue in Figures 1a-c are difficult to distinguish.

Referee #3 (Remarks to the Author):

The authors describe their findings on experimental SARS-CoV-2 infection of golden Syrian hamsters, that were a good model for SARS in 2003. The virus replicates in the upper and lower respiratory tract, with associated pathology and viral antigen detection. The hamsters lose weight but recover and they develop neutralizing antibodies in the serum. The virus transmits to co-housed hamsters. The findings will be interest to the virology community and those that are working on medical countermeasures. However, a more comprehensive paper has been published, with very similar findings (Chan et al Clinical Infectious Diseases) and this paper does not really add anything to the Chan paper. If the authors evaluated airborne transmission in their model, that would add novelty and would be an important study, whether the virus transmitted or didn't.

There appears to be more robust replication in the lungs than has been reported for ferrets. This should be addressed. Is it possible for the authors conduct a study in another model eg ferrets in order to compare the models?

The paper needs some editing for style and grammar.

**Author Rebuttals to Initial Comments:**

We thank the editor and reviewers for the constructive comments and suggestions. Point-to-point responses to the reviewers' comments are appended below.

Referee #1:

*I have reviewed the manuscript by Sin Fun Sia et al. concerning a hamster model for SARS-CoV-2. The authors describe high levels of virus replication and shedding in the hamster, observe weight loss, and describe histological changes in upper and lower respiratory tract and in the intestinal tract. The study also describes contact transmission to naïve hamsters, with weight loss, virus replication and seroconversion in the contact hamsters. The study is well-executed and data are well-described. A small animal model for SARS-CoV-2 that does not require genetic manipulation of the host (e.g. knockout/in mice) or the virus (e.g. mouse-adapted virus) is an incredibly important tool for studying pathogenesis and medical countermeasures for COVID-19. I only have minor comments.*

1. *It is unfortunate that the authors did not collect rectal swabs, it would have been nice to see if the viral antigen observed by IHC correlates with viral shedding from the intestinal tract. But if these samples weren't collected there is nothing to be done about that.*

Response:

We thank the reviewer for the comment. We performed additional experiments to assess the transmission potential of SARS-CoV-2 via aerosols and fomites. Fecal samples were collected every other day from the donor and contacts. Viral RNA but not infectious virus was continued detected from the fecal samples of inoculated donor and infected contact hamsters. The results are summarized in Figure 3 of the revised manuscript.

2. *It is of interest to describe the lung lesions more specifically: were entire lungs affected or were these lesions focal?*

Response:

We have asked the pathologist to provide an estimation on the lung lesion affected on days 2, 5, 7 post-inoculation (N=3 at each time point). Histopathological examination detected an increase in inflammatory cells and consolidation in 5-10% of the lungs on 2 dpi and 15-35% of the lungs on 5 dpi. On 7 dpi, there was an increased consolidation in 30-60% of the lungs. We have updated the findings in the revised manuscript.

3. *In Fig. 1A-C it would be helpful to use a different color for symbols indicating viral RNA vs symbols indicating virus titer.*

Response:

We have selected a different color scheme for the data points. The figure legend has also been revised to explain that the infectious viral load ( $\log_{10}\text{TCID}_{50}/\text{mL}$ ) are shown in bars and viral RNA ( $\log_{10}$  RNA copies/mL) are shown in dots.

4. *For the histology panels, it would be helpful to indicate some of the elements described in the text with arrows.*

Response:

We have followed the reviewer's suggestion and added arrows to indicate the elements described in the text.

5. *I hope the authors are testing whether this virus can transmit via air. The question keeps coming up and hasn't been adequately addressed so far.*

Response:

We thank the reviewer for the comment. We now provide data on the SARS-CoV-2 transmission potential via aerosols and fomites in the revised manuscript. Transmission via aerosol was highly efficient to 3/3 of contact hamsters while transmission via fomites in soiled cages was less efficient (1/3). In addition, we evaluated the communicable period of the inoculated donor hamsters. We found that despite of the continuous detection of viral RNA in the donors' nasal washes, the communicable period was short and was correlated with detection of infectious virus but not viral RNA in the nasal washes.

Referee #2:

*In this manuscript, Sia et al show that Golden Syrian hamsters infected with SARS-CoV-2 may be a useful model for studying mild human COVID-19. The authors demonstrate infection of hamsters and most importantly, transmission to co-housed hamsters. The data are convincing and the manuscript is well written.*

- 1. The main problem with the manuscript is that it is not novel. A previous report authored by another group in Hong Kong was published in Clinical Infectious Diseases and obtained virtually identical results. The only obvious difference between the studies is that contact hamsters did not lose weight in the published study while the contact hamsters in the study under consideration did. The published study also included additional experiments.*

Response:

We sent an pre-submission inquiry on 20 March 2020 and our manuscript was submitted on 26 March 2020. The study by Chan et al. (CID 2020) was published one day after our manuscript was submitted. The study by Chan et al. use hamsters of both gender and we used male hamsters. It remain to be investigated if the differential weight changes is gender related.

We now provide data on the SARS-CoV-2 transmission potential via aerosols and fomites in the revised manuscript. Transmission via aerosol was highly efficient to 3/3 of contact hamsters while transmission via fomites in soiled cages was less efficient (1/3). In addition, we evaluated the communicable period of the inoculated donor hamsters. We found that despite of the continuous detection of viral RNA in the donors' nasal washes, the communicable period was short and was correlated with detection of infectious virus but not viral RNA in the nasal washes.

- 2. The transmission studies are important and should be extended to co-housed hamsters separated by a wire screen. Hamster grooming habits may limit the relevance to human transmission.*

Response:

We thank the reviewer for the suggestion. Additional data on SARS-CoV-2 transmission in hamsters is now provided in the revised manuscript.

3. *Figure 1-The different shades of blue in Figures 1a-c are difficult to distinguish.*

Response:

We have followed the reviewer's suggestion and changed the color scheme used for Fig. 1a-c.

Referee #3:

The authors describe their findings on experimental SARS-CoV-2 infection of golden Syrian hamsters, that were a good model for SARS in 2003. The virus replicates in the upper and lower respiratory tract, with associated pathology and viral antigen detection. The hamsters lose weight but recover and they develop neutralizing antibodies in the serum. The virus transmits to co-housed hamsters. The findings will be interest to the virology community and those that are working on medical countermeasures.

1. *However, a more comprehensive paper has been published, with very similar findings (Chan et al Clinical Infectious Diseases) and this paper does not really add anything to the Chan paper. If the authors evaluated airborne transmission in their model, that would add novelty and would be an important study, whether the virus transmitted or didn't.*

Response:

We thank the reviewer for the comment. We now provide data on the SARS-CoV-2 transmission potential via aerosols and fomites in the revised manuscript. Transmission via aerosol was highly efficient to 3/3 of contact hamsters while transmission via fomites in soiled cages was less efficient (1/3). In addition, we evaluated the communicable period of the inoculated donor hamsters. We found that despite of the continuous detection of viral RNA in the donors' nasal washes, the communicable period was short and was correlated with detection of infectious virus but not viral RNA in the nasal washes.

2. *There appears to be more robust replication in the lungs than has been reported for ferrets. This should be addressed. Is it possible for the authors conduct a study in another model eg ferrets in order to compare the models?*

Response:

We agree with the reviewer that species differences is an important question for further investigation, but this is out of the scope of the current study. Importantly, qualitative analyses on

the binding affinity between ACE2 receptors from different hosts with SARS-CoV-2 should be performed. This can be accompanied by quantitative analyses of ACE2 expression in animal tissues.

3. *The paper needs some editing for style and grammar.*

Response:

The manuscript has been proof-read by a native speaker for grammar.
